# Supplementary material for: A two-dimensional chromogenic sensor as well as fluorescence inverter: selective detection of copper(ii) in aqueous medium
Source: Royal Society of Chemistry journal article supplement (doi:10.1039/b504823k), 2005-01-01
Supplement: b504823k.pdf [file b504823k.pdf]

## Supporting Information

### **A two-dimensional chromogenic sensor as well as fluorescence inverter: selective detection of copper(II) in aqueous medium**

Sandip Banthia and Anunay Samanta\*

*School of Chemistry, University of Hyderabad, Hyderabad 500 046, India.*

*E-mail: ascc@uohyd.ernet.in*

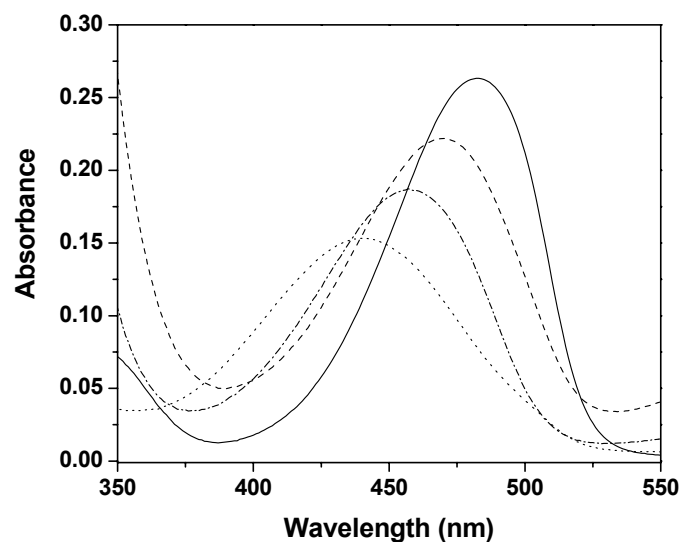

**Figure S1.** Absorption spectra of **1** before and after the addition of Cu<sup>2+</sup> ions and reversed changes upon addition of EDTA. (—) **1** ( $5 \times 10^{-6}$  M), (····) **1** + Cu<sup>2+</sup> ( $2 \times 10^{-3}$  M), (– · – ·) **1** + Cu<sup>2+</sup> ( $2 \times 10^{-3}$  M) + EDTA ( $2 \times 10^{-3}$  M) and (– – –) **1** + Cu<sup>2+</sup> ( $2 \times 10^{-3}$  M) + EDTA (excess).

# Supplementary Material (ESI) for New Journal of Chemistry  
# This journal is © The Royal Society of Chemistry and  
# The Centre National de la Recherche Scientifique, 2005

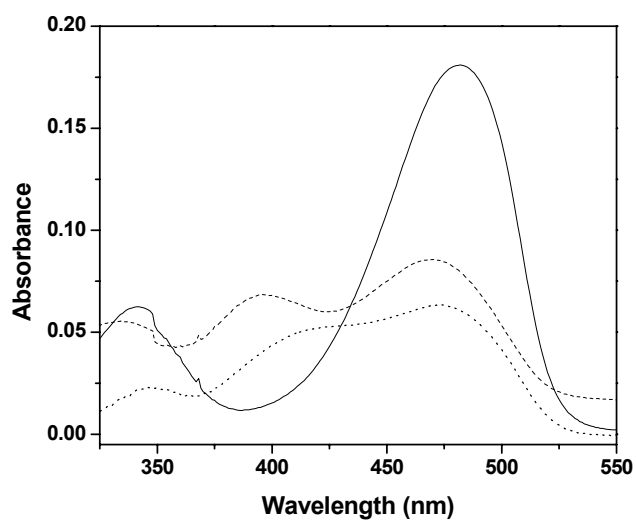

**Figure S2.** Absorption spectra of **1** ( $5 \times 10^{-6}$  M) in water (pH 7.4, 10 mM HEPES) in the presence of metal cations. (—)  $\text{Mg}^{2+}$ ,  $\text{Ca}^{2+}$  in excess, (····)  $\text{Zn}^{2+}$  ( $2 \times 10^{-2}$  M) and (----)  $\text{Ni}^{2+}$  ( $1 \times 10^{-2}$  M).
